# Supplementary material for: Facile synthesis and electronic structure optimization of sub-nanometer palladium clusters for efficient direct synthesis of H2O2
Source: Royal Society of Chemistry journal article supplement (doi:10.1039/d4cy00567h), 2024-01-01
Supplement: d4cy00567h1.pdf [file d4cy00567h1.pdf]

## Supporting Information

### Facile Synthesis and Electronic Structure Optimization of Sub-nanometer Palladium Clusters for Efficient Direct Synthesis of H<sub>2</sub>O<sub>2</sub>

Yulu Chen<sup>a,b</sup>, Hongyan Pan<sup>a,b</sup>, Chunliang Yang<sup>a,b</sup>, Haipeng Xiao<sup>a,b</sup>, Zheng Chen<sup>a,b\*</sup>, Chun Zhu<sup>a</sup>, Weiyue Zhao<sup>a,b\*</sup>, Qian Lin<sup>a,b\*</sup>

<sup>a</sup> School of Chemistry and Chemical Engineering, Guizhou University, Guiyang, Guizhou 550025, China.

<sup>b</sup> Guizhou Key Laboratory of Green Chemical and Clean Energy Technology, Guiyang, Guizhou 550025, China

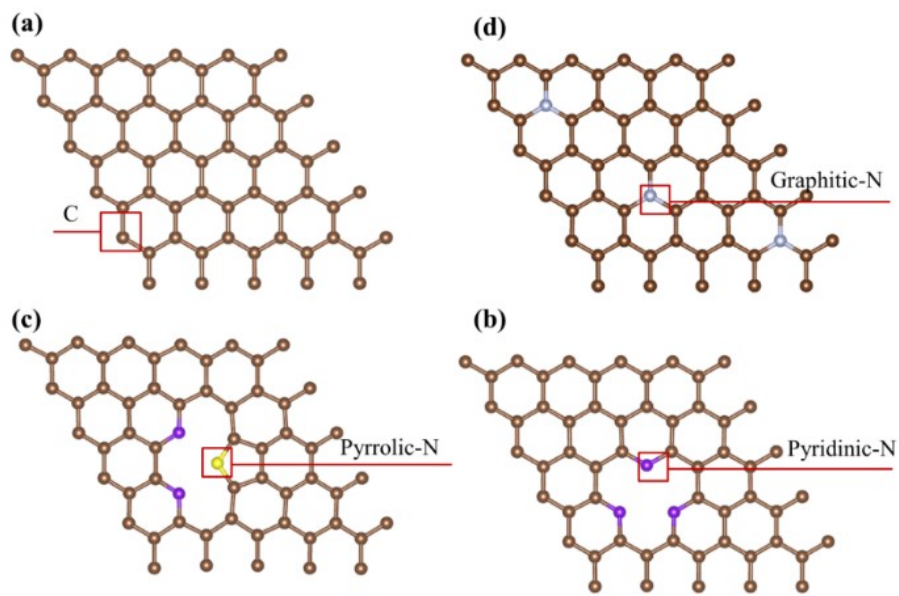

**Figure S1.** The models of (a) graphitic, (b) graphitic doped with Pyridinic-N, (c) graphitic doped with Pyrrolic-N and (d) graphitic doped with Graphitic-N.

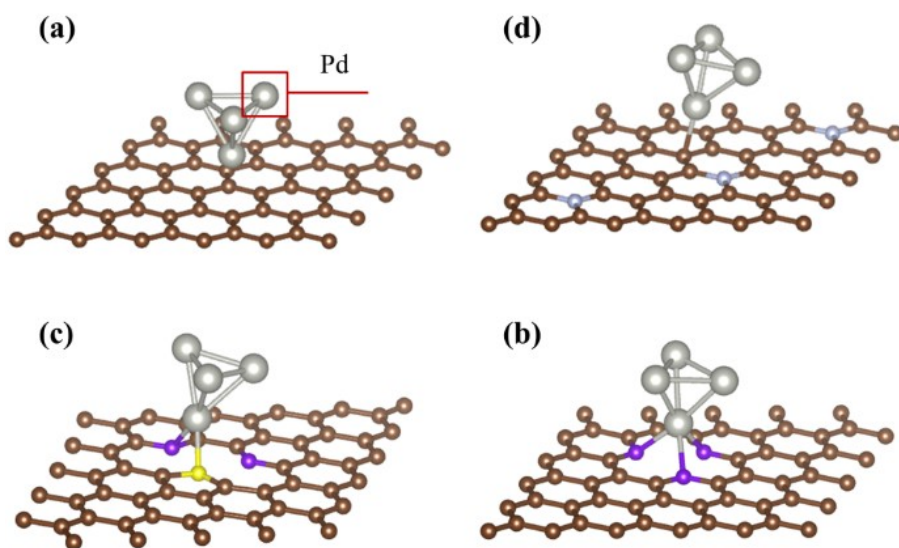

**Figure S2.** (a) The optimized models of Pd cluster adsorbed on (a) graphitic, (b) graphitic doped with Pyridinic-N, (c) graphitic doped with Pyrrolic-N and (d) graphitic doped with Graphitic-N.

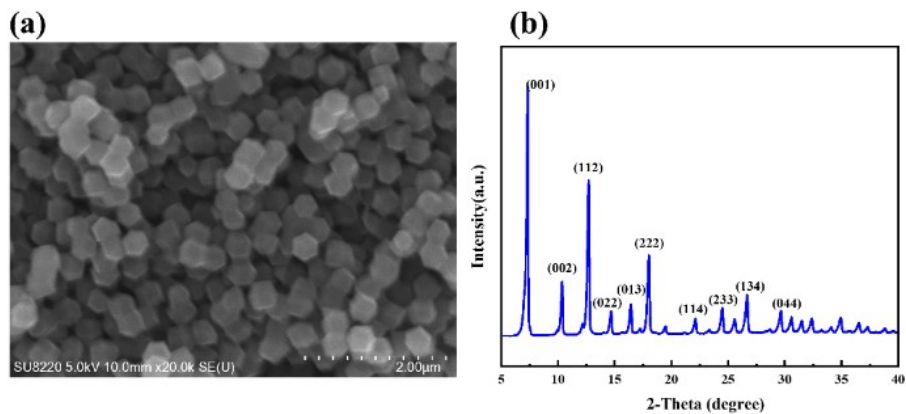

**Figure S3.** (a) SEM image of ZIF-8; (b)XRD spectra of ZIF-8

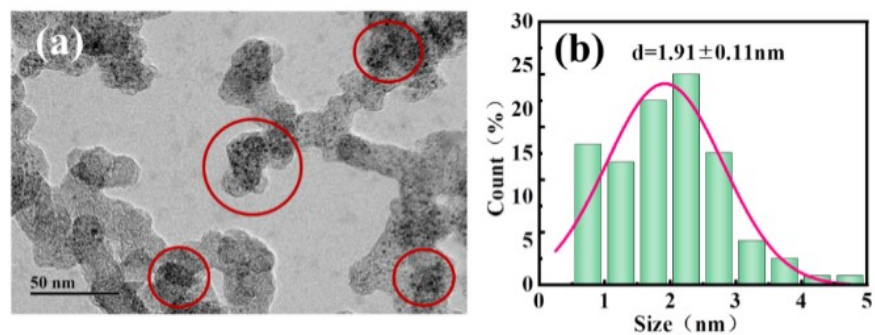

**Figure S4.** (a) TEM images of Pd/ XC-72. (b) Pd NPs size distribution of Pd/ XC-72.

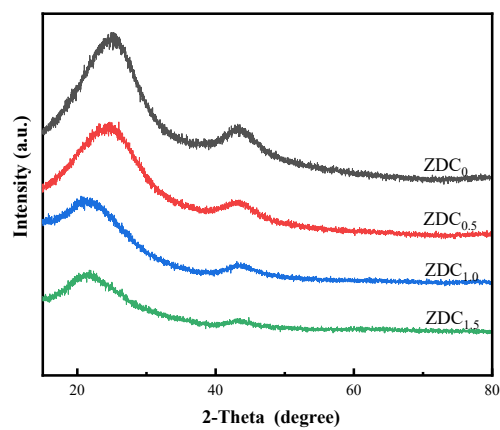

**Figure S5.** XRD spectra of ZDC<sub>x</sub>.

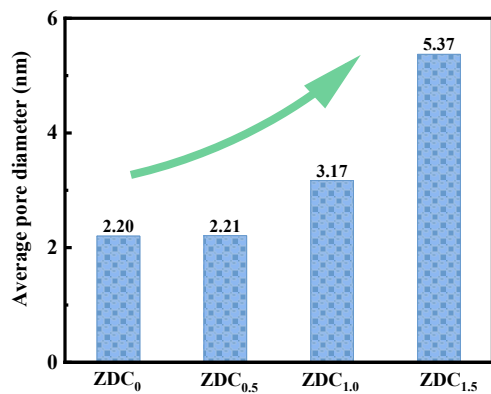

**Figure S6.** Average pore diameter of ZDC<sub>X</sub>.

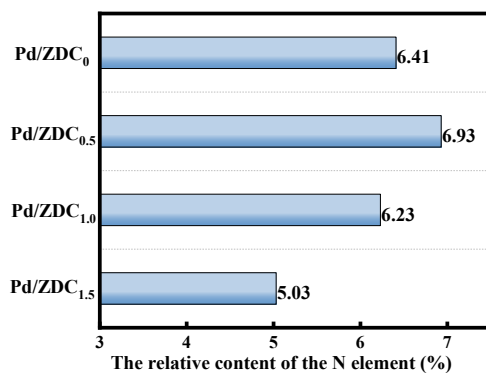

**Figure S7.** The relative content of the N element of ZDC<sub>0</sub>, ZDC<sub>0.5</sub>, ZDC<sub>1.0</sub> and ZDC<sub>1.5</sub>

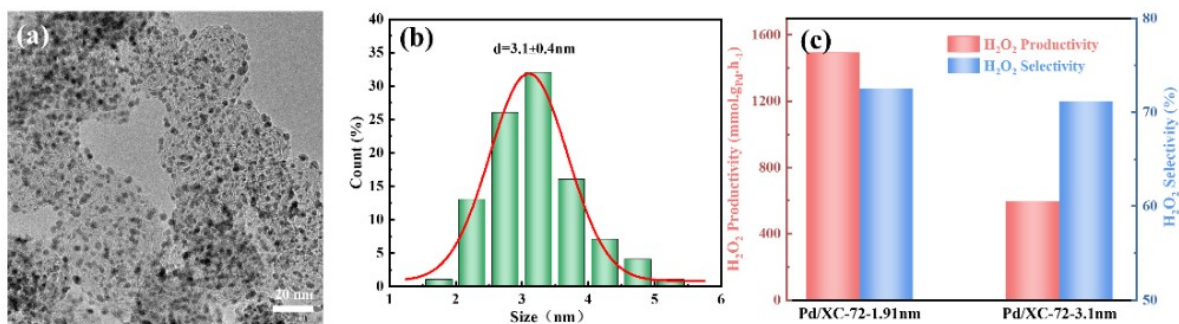

**Figure S8.** (a) TEM image of Pd/XC-72-3.1nm, (b) Pd NPs size distribution of Pd/XC-72, (c) evaluation results of catalytic performance of Pd/XC-72-1.91nm and Pd/XC-72-3.1 nm.

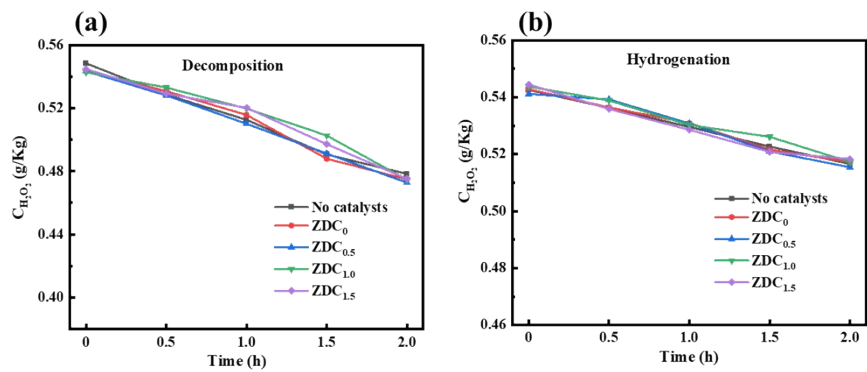

**Figure S9.** (a)  $H_2O_2$  decomposition and (b) hydrogenation test for  $ZDC_X$  carriers.

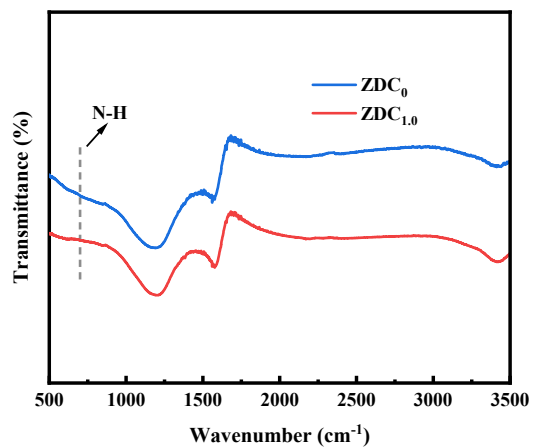

**Figure S10.** FTIR spectra of  $ZDC_0$  and  $ZDC_{1.0}$ .

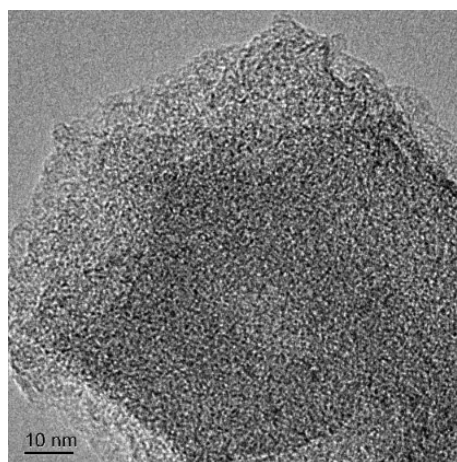

**Figure S11.** TEM of  $Pd/ZDC_{1.0}$  catalyst after four cyclic experiments

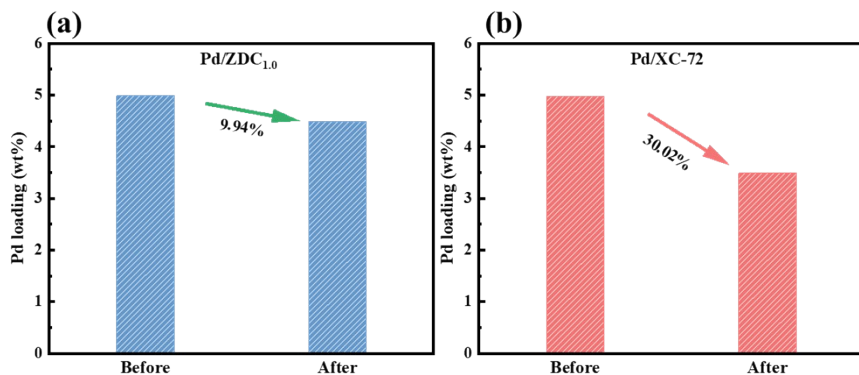

**Figure S12.** The Pd leaching rate of catalysts after cycling experiments, (a) Pd/ZDC<sub>1.0</sub>, (b) Pd/XC-72.

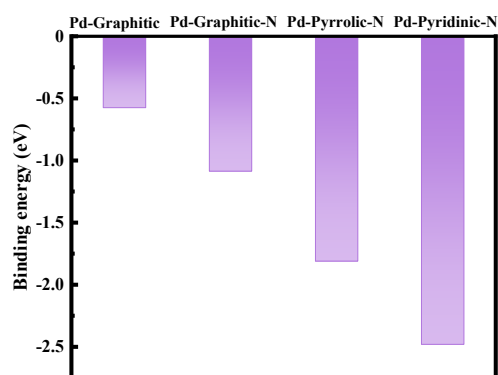

**Figure S13.** Binding energy of Pd cluster adsorbed on pristine graphitic and graphitic doped with graphitic-N, pyrrolic-N and pyridinic-N.

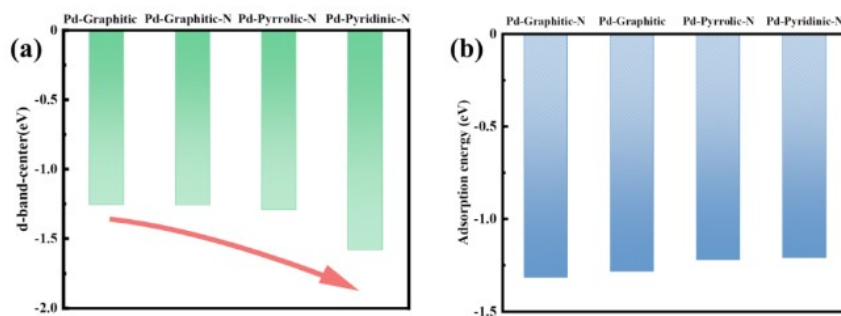

**Figure S14.** (a) The d-band-center of Pd cluster adsorbed on graphitic and graphitic doped with graphitic-N, pyrrolic-N and pyridinic-N. (b) Adsorption energy of O<sub>2</sub> on Pd-Graphitic, Pd-Graphitic-N, Pd-pyrrolic-N and Pd-pyridinic-N

**Table S1** The Pd loading of catalysts measured by ICP-AES

| catalysts             | theoretical Pd loading (wt%) | actual Pd loading (wt%) | residual Zn (wt%) |
|-----------------------|------------------------------|-------------------------|-------------------|
| Pd/ZDC <sub>0</sub>   | 5.0                          | 4.865                   | N/A               |
| Pd/ZDC <sub>0.5</sub> | 5.0                          | 4.902                   | N/A               |
| Pd/ZDC <sub>1.0</sub> | 5.0                          | 4.934                   | N/A               |
| Pd/ZDC <sub>1.5</sub> | 5.0                          | 4.896                   | N/A               |
| Pd/XC-72              | 5.0                          | 4.878                   | /                 |

Δ: N/A indicates that no corresponding element has been detected.

**Table S2.** Structural parameters of ZDC<sub>x</sub>.

| catalyst              | S <sub>BET</sub> (m <sup>2</sup> /g) | V <sub>mic</sub> (cm <sup>3</sup> /g) | V <sub>mes</sub> (cm <sup>3</sup> /g) |
|-----------------------|--------------------------------------|---------------------------------------|---------------------------------------|
| Pd/ZDC <sub>0</sub>   | 1230.51                              | 0.44                                  | 0.24                                  |
| Pd/ZDC <sub>0.5</sub> | 1845.97                              | 0.61                                  | 0.41                                  |
| Pd/ZDC <sub>1.0</sub> | 2964.64                              | 0.75                                  | 1.60                                  |
| Pd/ZDC <sub>1.5</sub> | 3088.89                              | 0.82                                  | 3.32                                  |
